# Supplementary material for: SkQ1 Ophthalmic Solution for Dry Eye Treatment: Results of a Phase 2 Safety and Efficacy Clinical Study in the Environment and During Challenge in the Controlled Adverse Environment Model
Source: PubMed Central journal article supplement — Adv Ther. 2016 Jan 5;33(1):96–115. doi: 10.1007/s12325-015-0274-5 (PMC4735228; doi:10.1007/s12325-015-0274-5), 2016-01-05
Supplement: 12325_2015_274_MOESM1_ESM.pdf [file 12325_2015_274_MOESM1_ESM.pdf]

## *Why carry out this study?*

- An unmet need exists for drug treatments that address the causes of dry eye, such as oxidative stress
- The study assessed whether mitochondria-targeted SkQ1 treatment reduced the signs and symptoms of dry eye disease compared to placebo

## *What was learned from the study?*

- SkQ1 treatment was effective and safe for treating dry eye signs and symptoms
- Mitochondrial-targeted antioxidants such as SkQ1 provide a novel approach to dry eye treatment

This summary slide represents the opinions of the authors. Sponsorship for this study was funded by Mitotech S.A. For a full list of acknowledgments and disclosures for all authors of this article, please see the full text online. © The Author(s) 2015. Creative Commons Attribution Noncommercial License (CC BY-NC).
